# Supplementary material
Source: PubMed Central journal article supplement (PMC8819849)
Supplement: PRO-31-396-s001.pdf [file PRO-31-396-s001.pdf]

## Supporting information for

### Protection by desiccation-tolerance proteins probed at the residue level

Candice J. Crilly<sup>†1</sup>, Julia A. Brom<sup>†1</sup>, Owen Warmuth<sup>†</sup>, Harrison J. Esterly<sup>†</sup>, and Gary J. Pielak<sup>\*,†,‡,§,||</sup>.

<sup>†</sup>Department of Chemistry, University of North Carolina at Chapel Hill (UNC-CH), <sup>‡</sup>Department of Biochemistry & Biophysics, UNC-CH, <sup>§</sup>Lineberger Cancer Center, UNC-CH, <sup>||</sup>Integrative Program for Biological and Genome Sciences, UNC-CH, Chapel Hill, NC

## Supplemental figures

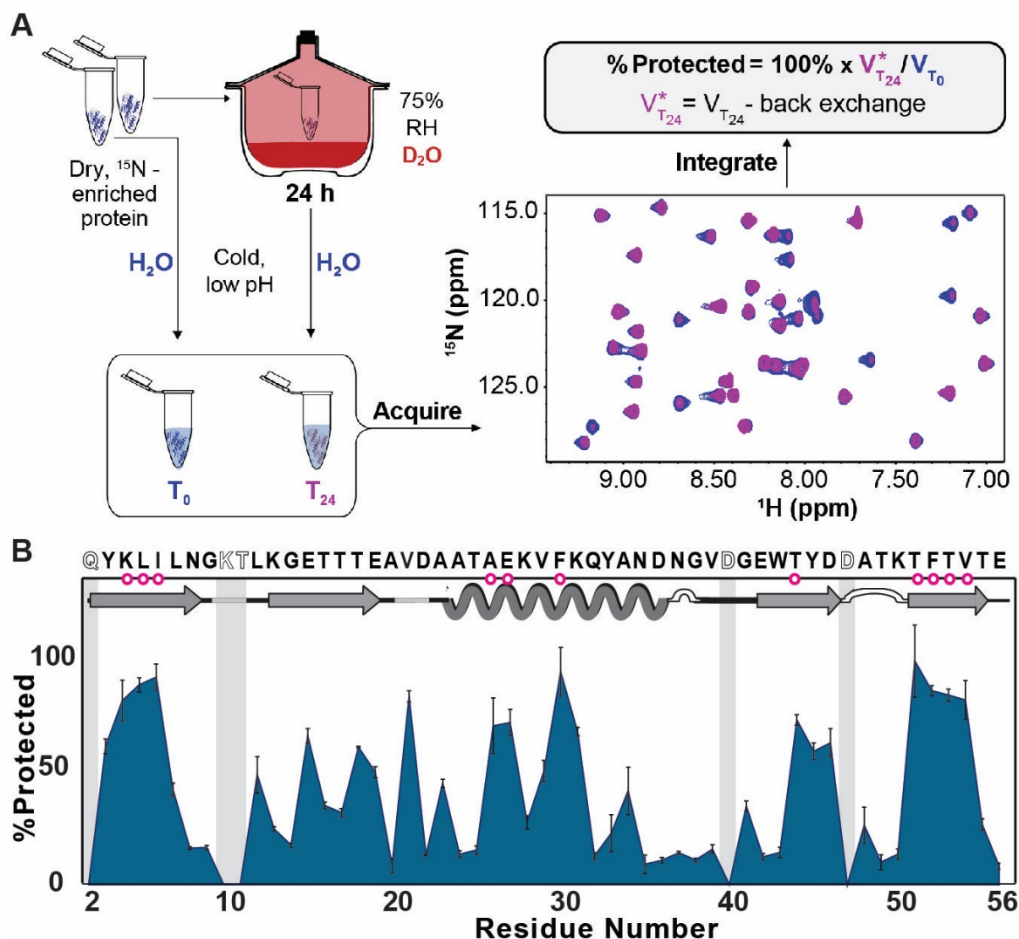

**Figure S1. LOVE NMR workflow and output.** A) LOVE NMR workflow. Identical samples of  $^{15}\text{N}$ -enriched protein dried alone or in the presence of a cosolute are resuspended in cold, acidic buffer before ( $T_0$ ) or after ( $T_{24}$ ) 24 h exposure to  $\text{D}_2\text{O}$  vapor at 75% relative humidity (RH). Amide protons unprotected in the dry state exchange with deuterons from the vapor, resulting in smaller cross peak volumes in the  $T_{24}$   $^{15}\text{N}$ - $^1\text{H}$  HSQC spectrum relative to the  $T_0$  spectrum (pink and blue cross peaks, respectively). To correct for solution back-exchange that occurs before and during spectrum acquisition, serial HSQC spectra are obtained for the  $T_{24}$  sample, integrated, and fit to the equation  $V_{T_{24}}(t) = A(1 - e^{-bt}) + V_{T_{24}}^*$ , where  $V_{T_{24}}$  is peak volume,  $t$  is time since resuspension,  $A$  is a scaling factor,  $b$  is the observed rate of exchange, and  $V_{T_{24}}^*$  the peak volume before any back exchange (see Materials and Methods). The fitted  $V_{T_{24}}^*$  value is then divided by the maximum possible peak volume,  $V_{T_0}$ , and multiplied by 100 to obtain %Protected. B) LOVE profile of model protein GB1 freeze-dried in 1.5 mM HEPES, pH 6.5. Open letters indicate residues with undefined dry-state protection because they are 100% quench-labelled. Secondary structure ( $\beta$ -strands; undulations, helix; white bumps, turns; gray lines, bends) is shown at top, with magenta circles indicating solution global unfolding residues. Gray areas indicate the absence of data. Error bars represent uncertainty propagated from standard deviations from the mean from triplicate analysis.

**A** CAHS D

1 - 31 M S G R N V E S H M E R N E K V V V N N S G H A D V K K Q Q Q  
 Q V E H T E F T H T E V K A P L I H P A P P I I S T G A A G L  
 63 - 93 A E E I V G Q G F T A S A A R I S G G T A E V H L Q P S A A M  
 T E E A R R D Q E R Y R Q E Q E S I A K Q Q E R E M E K K T E  
 125 - 155 A Y R K T A E A E A E K I R K E L E K Q H A R D V E F R K D L  
 I E S T I D R Q K R E V D L E A K M A K R E L D R E G Q L A K  
 187 - 217 E A L E R S R L A T N V E V N F D S A A G H T V S G G T T V S  
 T S D K M E I K R N

PvLEA4

1 - 31 M V K Q D N L D Q T R D Q I K S A T D R G A D K L K E G R D K  
 A Q G M W E E G K E K T Q Q T W D E T K Q K Y E E G K D K G Q  
 63 - 93 D K Y H E A K E N T K D M F Q T A A D K L A A A K D T V V D T  
 L C S A K D T V K E K V V G A K D A T A D Y L G E K K E Q M R  
 125 - 143 D T K D E T L E S M K S D K N K N C C

**B**

| Job Title      | CAHS D                                                                                      |
|----------------|---------------------------------------------------------------------------------------------|
| RID            | <a href="#">JK899JMW11N</a> Search expires on 08-29 10:36 am <a href="#">Download All</a> ▼ |
| Program        | Blast 2 sequences <a href="#">Citation</a> ▼                                                |
| Query ID       | Icl Query_84359 (amino acid)                                                                |
| Query Descr    | CAHS D                                                                                      |
| Query Length   | 227                                                                                         |
| Subject ID     | Icl Query_84361 (amino acid)                                                                |
| Subject Descr  | PvLEA4                                                                                      |
| Subject Length | 143                                                                                         |

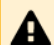

No significant similarity found. For reasons why, [click here](#)

**Figure S2. Primary structure comparisons of CAHS D and PvLEA4.** A) Amino acid sequences of CAHS D and PvLEA4. Red, blue, gray, and purple circles indicate negatively charged residues, positively charged residues, neutral residues, and histidines, respectively. B) Results of sequence alignment of CAHS D and PvLEA4 using protein BLAST with default algorithm parameters.<sup>1</sup>

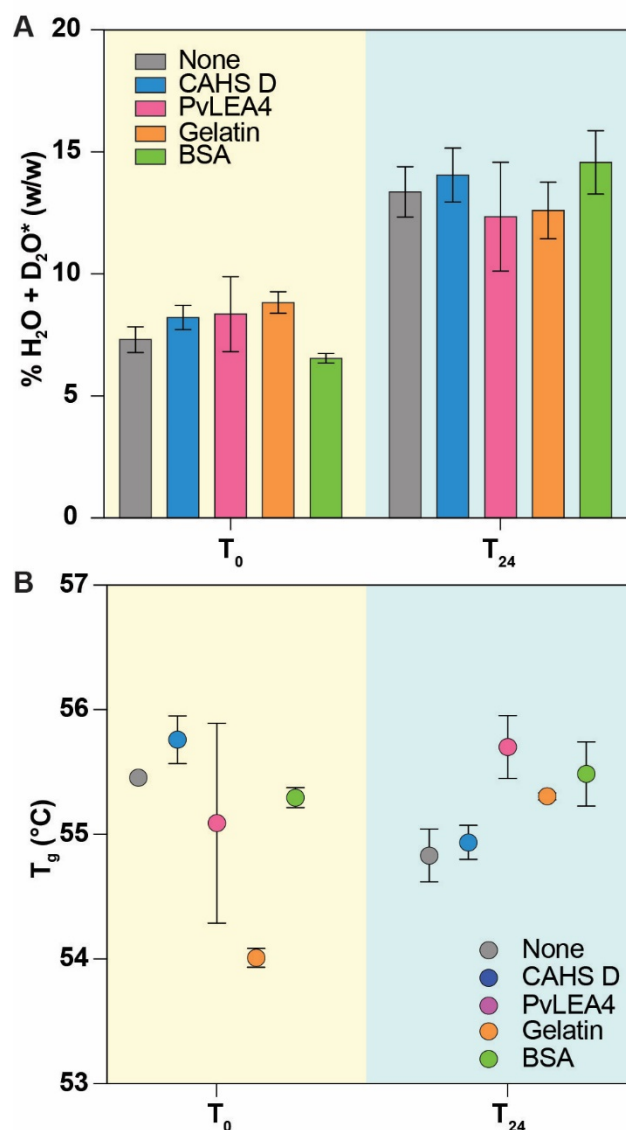

**Figure S3. Water content and glass transition temperature of dehydrated protein mixtures before and after exposure to 75% relative humidity ( $\text{D}_2\text{O}$ ).** A) Percent  $\text{H}_2\text{O}$  ( $T_0$ ) or  $\text{H}_2\text{O} + \text{D}_2\text{O}$  ( $T_{24}$ ) by weight of samples lyophilized from 650  $\mu\text{L}$  of 500  $\mu\text{M}$  GB1 and 5 g/L of indicated protectants before and after ( $T_0$  and  $T_{24}$ , respectively) incubation in 75% RH  $\text{D}_2\text{O}$ . Error bars represent the standard deviation from 3 independent measurements for GB1 with CAHS D, 4 independent measurements for GB1 with PvLEA4, and the range of 2 independent measurements for other data. B) Glass transition temperature,  $T_g$ , of formulations of lyophilized 650  $\mu\text{L}$  aliquots of 500  $\mu\text{M}$  GB1 and 5 g/L of indicated protectants before and after ( $T_0$  and  $T_{24}$ , respectively) incubation in 75% RH  $\text{D}_2\text{O}$ . Error bars represent the range of 2 independent measurements.

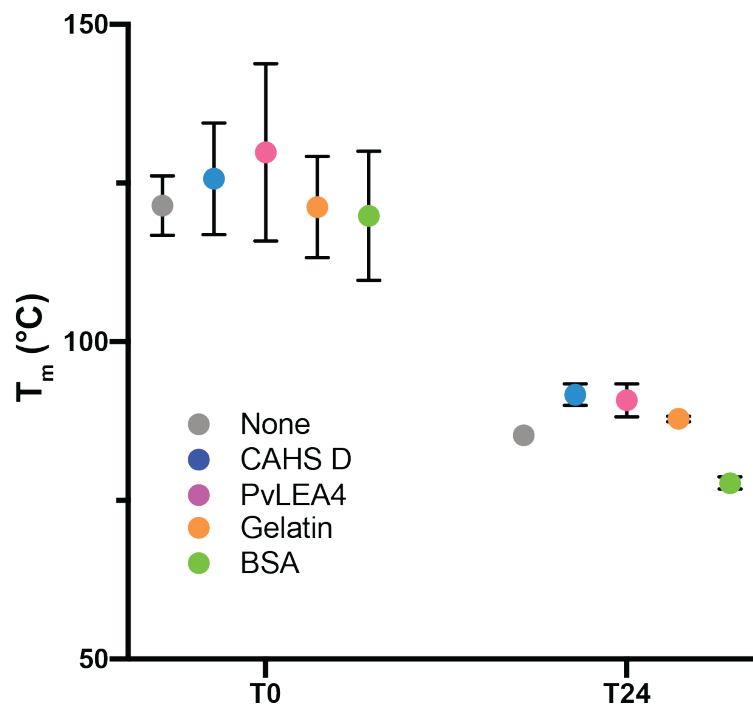

**Figure S4. Denaturation temperature,  $T_m$ , of dehydrated protein mixtures before and after exposure to 75% relative humidity ( $D_2O$ ).**  $T_m$  of GB1 lyophilized from 650  $\mu L$  aliquots of 500  $\mu M$  GB1 alone or with 5 g/L of the indicated protectant before and after incubation at 75% RH  $D_2O$  ( $T_0$  and  $T_{24}$ , respectively.) As expected, as moisture content increases,  $T_m$  of GB1 decreases.<sup>2-3</sup>  $T_m$  is similar for all protectants, except for BSA,  $T_m$  is lower at  $T_{24}$ . Error bars are the standard deviation from 3 independent measurements for GB1 with CAHS D and PvLEA4 and represent the range of 2 independent measurements other data.

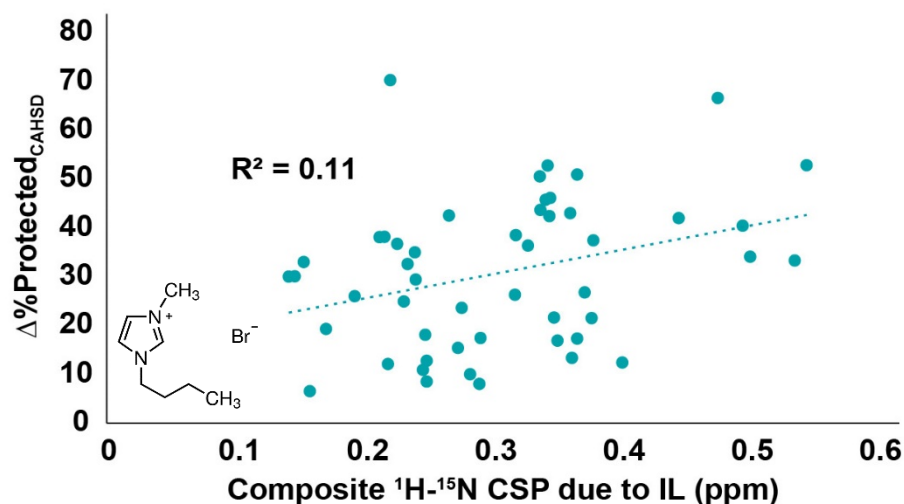

**Figure S5. Correlation of composite chemical shift perturbations induced by an ionic liquid and  $\Delta\%\text{Protected}$  induced by drying with 5 g/L CAHS D.** Non-quench-labelled GB1 residues are included ( $n=50$ ). The  $^1\text{H}$ - $^{15}\text{N}$  composite chemical shift perturbations (CSPs) induced by 50% v/v 1-butyl-3-methylimidazolium bromide ( $[\text{C}_4\text{-mim}]\text{Br}$ ), an ionic liquid (IL) are from the data of Warner *et al.*<sup>4</sup> Chemical structure of  $[\text{C}_4\text{-mim}]\text{Br}$  is shown in the inset. The probability that the R arises from uncorrelated data is less than 5%.<sup>5</sup>

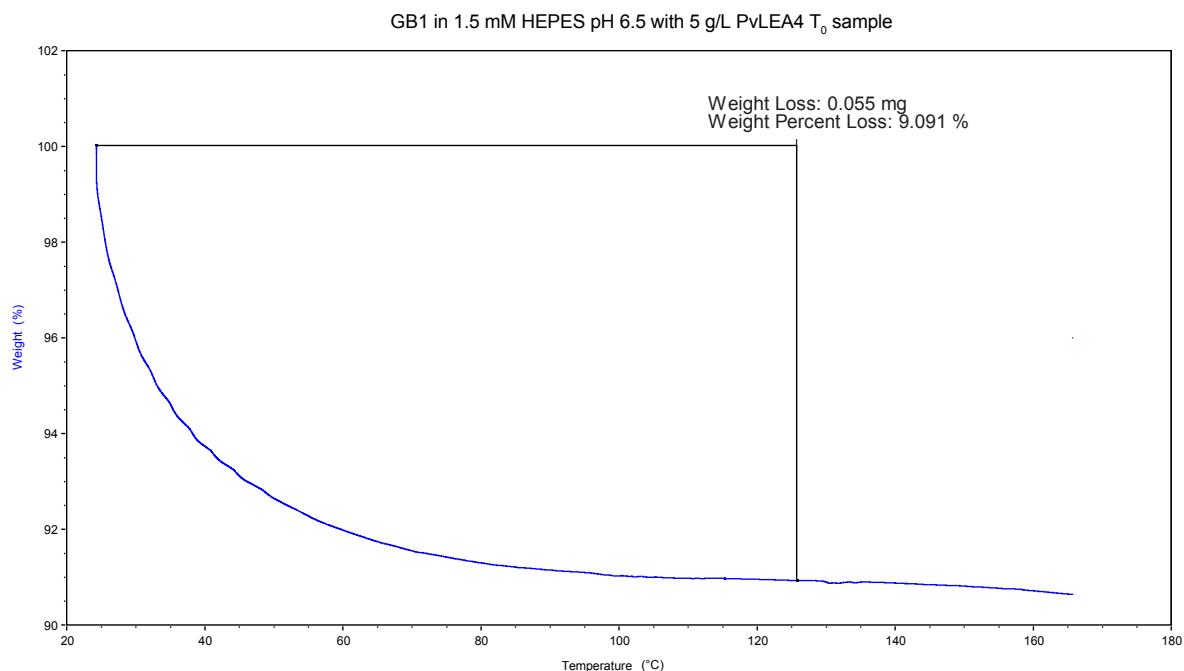

**Figure S6.** Representative data from thermogravimetric analysis. The initial change in weight due to water loss is shown.

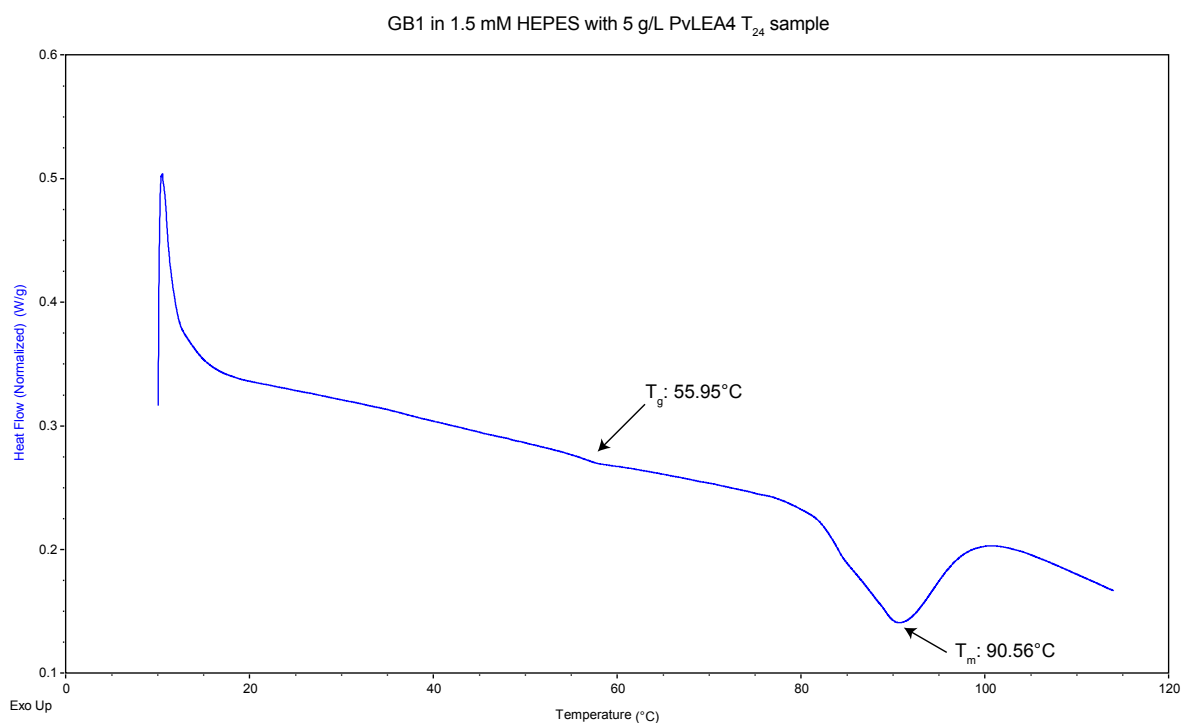

**Figure S7.** Representative differential scanning calorimetry (second scan). The glass transition- ( $T_g$ ) and denaturation- ( $T_m$ ) temperatures are indicated.



## **Supplemental Tables**

**Table S1. Hydrated fraction of GB1 solvent-accessible surface area (SASA)**

| Hydrated fraction of GB1 SASA $\pm$ uncertainty |                 |                 |
|-------------------------------------------------|-----------------|-----------------|
| Protectant                                      | T <sub>0</sub>  | T <sub>24</sub> |
| None                                            | 0.40 $\pm$ 0.03 | 0.70 $\pm$ 0.06 |
| CAHS D                                          | 0.44 $\pm$ 0.03 | 0.74 $\pm$ 0.07 |
| PvLEA4                                          | 0.46 $\pm$ 0.09 | 0.6 $\pm$ 0.1   |
| Gelatin                                         | 0.49 $\pm$ 0.03 | 0.65 $\pm$ 0.07 |
| BSA                                             | 0.35 $\pm$ 0.01 | 0.77 $\pm$ 0.08 |

We assumed that all water is bound to GB1, that all water in the T<sub>0</sub> sample is H<sub>2</sub>O, and that all water in the T<sub>24</sub> sample is D<sub>2</sub>O. The values are calculated by multiplying the molar ratio of water to GB1 (as measured by TGA) by the average amount of protein surface covered by a water molecule (20 Å<sup>2</sup>),<sup>6</sup> and then dividing that value by the surface area of the native solution structure of GB1 (3727 Å<sup>2</sup>) as determined by the PyMOL get\_area function for PDB 2QMT. Origins of uncertainties are described in the caption of Fig. 2.

**Table S2. Average %Protected values of GB1 dried alone or in the presence of 5 g/L protectant.**

| Residue | No protectant | +CAHS D  | +PvLEA4     | +Gelatin   | +BSA |
|---------|---------------|----------|-------------|------------|------|
| Y3      | 61 ± 3        | 90 ± 10  | 90 ± 1      | 88 ± 6     | 69   |
| K4      | 81 ± 9        | 108 ± 8  | 95 ± 1      | 94 ± 1     | 76   |
| L5      | 88 ± 3        | 102 ± 9  | 99.2 ± 0.3  | 96 ± 6     | 91   |
| I6      | 92 ± 6        | 130 ± 10 | 100.2 ± 0.2 | 89 ± 3     | 87   |
| L7      | 42 ± 3        | 110 ± 10 | 109 ± 20    | 90 ± 10    | 52   |
| 8N      | 16 ± 1        | 34 ± 4   | 40 ± 1      | 31 ± 3     | 19   |
| 9G      | 16 ± 1        | 36 ± 9   | 25 ± 4      | 19 ± 2     | 17   |
| 12L     | 49 ± 8        | 90 ± 20  | 82 ± 1      | 60 ± 20    | 58   |
| 13K     | 25 ± 1        | 60 ± 10  | 51 ± 4      | 32 ± 2     | 26   |
| 14G     | 17 ± 1        | 34 ± 7   | 37 ± 2      | 26 ± 2     | 19   |
| 15E     | 66 ± 3        | 112 ± 6  | 90 ± 10     | 100 ± 10   | 81   |
| 16T     | 35 ± 2        | 78 ± 5   | 81 ± 9      | 73 ± 7     | 39   |
| 17T     | 32 ± 2        | 70 ± 20  | 48 ± 7      | 33 ± 4     | 31   |
| 18T     | 60.7 ± 0.4    | 110 ± 20 | 96 ± 1      | 90 ± 10    | 64   |
| 19E     | 50 ± 2        | 80 ± 10  | 60 ± 10     | 60 ± 10    | 51   |
| 20A     | 8 ± 3         | 16 ± 4   | 25 ± 1      | 17 ± 1     | 6    |
| 21V     | 83 ± 3        | 117 ± 6  | 90 ± 20     | 80 ± 10    | 64   |
| 22D     | 13.1 ± 0.3    | 22 ± 3   | 21 ± 1      | 16 ± 1     | 15   |
| 23A     | 45 ± 2        | 80 ± 10  | 58 ± 3      | 54 ± 7     | 40   |
| 24A     | 13 ± 1        | 26 ± 4   | 17 ± 3      | 16 ± 1     | 16   |
| 25T     | 15 ± 2        | 22 ± 1   | 28.0 ± 0.1  | 18 ± 4     | 18   |
| 26A     | 70 ± 10       | 116 ± 7  | 107 ± 1     | 99 ± 7     | 78   |
| 27E     | 72 ± 6        | 110 ± 30 | 96 ± 8      | 90 ± 10    | 64   |
| 28K     | 28 ± 3        | 70 ± 20  | 78 ± 1      | 54 ± 2     | 39   |
| 29V     | 50 ± 5        | 100 ± 10 | 92.0 ± 0.4  | 78 ± 5     | 53   |
| 30F     | 90 ± 10       | 116 ± 5  | 101 ± 1     | 110 ± 10   | 87   |
| 31K     | 68 ± 2        | 98 ± 3   | 91 ± 8      | 91 ± 7     | 60   |
| 32Q     | 13 ± 1        | 46 ± 8   | 52 ± 1      | 30 ± 2     | 21   |
| 33Y     | 23 ± 8        | 74 ± 2   | 85 ± 1      | 62 ± 5     | 34   |
| 34A     | 40 ± 10       | 110 ± 10 | 99 ± 1      | 87 ± 5     | 44   |
| 35N     | 9 ± 4         | 50 ± 4   | 52 ± 4      | 37 ± 3     | 17   |
| 36D     | 11 ± 1        | 37 ± 2   | 32 ± 1      | 23.3 ± 0.4 | 14   |
| 37N     | 14 ± 1        | 52 ± 3   | 57 ± 9      | 51 ± 2     | 22   |
| 38G     | 11 ± 1        | 28 ± 2   | 15.2 ± 0.5  | 14 ± 1     | 14   |
| 39V     | 16 ± 2        | 54 ± 7   | 55 ± 7      | 56 ± 5     | 18   |
| 41G     | 35 ± 2        | 60 ± 20  | 60 ± 10     | 45 ± 8     | 45   |
| 42E     | 12 ± 1        | 23 ± 3   | 23 ± 1      | 20 ± 1     | 14   |
| 43W     | 14 ± 2        | 38 ± 9   | 25 ± 5      | 16 ± 2     | 14   |
| 44T     | 73 ± 2        | 110 ± 7  | 98.1 ± 0.2  | 90 ± 4     | 72   |
| 45Y     | 59 ± 4        | 112 ± 8  | 80 ± 10     | 70 ± 20    | 63   |
| 46D     | 63 ± 6        | 90 ± 10  | 86 ± 2      | 79 ± 3     | 62   |
| 48A     | 26 ± 8        | 60 ± 10  | 46 ± 9      | 38 ± 6     | 35   |
| 49T     | 10 ± 3        | 20 ± 1   | 17 ± 1      | 14 ± 1     | 15   |
| 50K     | 13 ± 2        | 26 ± 2   | 42 ± 1      | 25 ± 3     | 19   |
| 51T     | 100 ± 20      | 120 ± 10 | 102 ± 2     | 97 ± 5     | 86   |
| 52F     | 86 ± 2        | 120 ± 10 | 110 ± 20    | 110 ± 20   | 87   |
| 53T     | 84 ± 3        | 117 ± 3  | 98 ± 1      | 95 ± 5     | 83   |
| 54V     | 81 ± 9        | 100 ± 20 | 98.2 ± 0.4  | 81 ± 4     | 63   |
| 55T     | 27 ± 2        | 56 ± 6   | 72 ± 1      | 61 ± 3     | 32   |
| 56E     | 8 ± 1         | 20 ± 5   | 21 ± 2      | 19 ± 1     | 16   |

Standard deviation from the mean for three independent measurements is reported for all conditions except for GB1 dried in the presence of BSA, which was measured once.

**Table S3. Average %Protected values of Cl2 dried alone or in the presence of 5 g/L protectant.**

| <b>Residue</b> | <b>No protectant</b> | <b>+CAHS D</b> | <b>+PvLEA4</b> | <b>+Gelatin</b> | <b>+BSA</b> |
|----------------|----------------------|----------------|----------------|-----------------|-------------|
| 4              | 11.3 ± 0.7           | 12 ± 1         | 11.7 ± 0.3     | 12.1 ± 0.5      | 12          |
| 5              | 60 ± 4               | 71 ± 2         | 65.9 ± 0.4     | 76 ± 3          | 68          |
| 7              | 37 ± 3               | 32 ± 2         | 40 ± 9         | 43 ± 2          | 40          |
| 8              | 68 ± 9               | 90 ± 8         | 73.8 ± 0.7     | 78 ± 3          | 77          |
| 9              | 38 ± 9               | 39 ± 1         | 35 ± 1         | 37.6 ± 0.9      | 41          |
| 11             | 86 ± 1               | 94.6 ± 0.6     | 92 ± 1         | 93 ± 5          | 90          |
| 12             | 11.0 ± 0.1           | 16 ± 6         | 11.6 ± 0.5     | 12.0 ± 0.5      | 13          |
| 13             | 18 ± 5               | 16 ± 4         | 17.0 ± 0.1     | 18.9 ± 0.8      | 17          |
| 14             | 13.9 ± 0.5           | 20 ± 10        | 16 ± 1         | 16.7 ± 0.4      | 16          |
| 15             | 15.2 ± 0.6           | 18 ± 3         | 15.2 ± 0.3     | 15.9 ± 0.7      | 16          |
| 16             | 90 ± 20              | 95 ± 3         | 85.7 ± 0.9     | 91 ± 4          | 87          |
| 17             | 16 ± 3               | 16 ± 1         | 17 ± 1         | 17.6 ± 0.9      | 18          |
| 18             | 24 ± 6               | 24 ± 2         | 25.1 ± 0.8     | 25.0 ± 0.7      | 25          |
| 19             | 85 ± 5               | 99 ± 8         | 90 ± 2         | 92 ± 5          | 89          |
| 20             | 94 ± 2               | 110 ± 10       | 94 ± 1         | 103 ± 5         | 99          |
| 21             | 91 ± 1               | 105 ± 10       | 92.5 ± 0.8     | 100 ± 5         | 96          |
| 22             | 71 ± 8               | 86 ± 5         | 74.4 ± 0.9     | 82 ± 4          | 75          |
| 24             | 79 ± 5               | 94 ± 3         | 85.0 ± 0.6     | 91 ± 5          | 81          |
| 26             | 24 ± 2               | 30 ± 20        | 24 ± 2         | 27.4 ± 0.5      | 26          |
| 27             | 18 ± 1               | 22 ± 1         | 20.9 ± 0.1     | 24.6 ± 0.9      | 20          |
| 28             | 19 ± 4               | 24 ± 3         | 24 ± 4         | 27 ± 2          | 17          |
| 29             | 12.2 ± 0.3           | 15 ± 5         | 12.5 ± 0.1     | 13.1 ± 0.7      | 13          |
| 30             | 93.5 ± 0.6           | 110 ± 10       | 98 ± 2         | 100 ± 4         | 106         |
| 31             | 79 ± 3               | 78 ± 2         | 82 ± 2         | 82 ± 5          | 70          |
| 32             | 96.4 ± 0.5           | 110 ± 10       | 101 ± 2        | 103 ± 5         | 100         |
| 34             | 13 ± 2               | 15.1 ± 0.4     | 17.1 ± 0.7     | 15.6 ± 0.8      | 15          |
| 35             | 58 ± 7               | 75 ± 1         | 63.4 ± 0.1     | 70 ± 3          | 62          |
| 37             | 24 ± 1               | 22.1 ± 0.4     | 26.8 ± 3.2     | 27 ± 1          | 26          |
| 38             | 14 ± 4               | 20 ± 9         | 15.8 ± 0.8     | 16.2 ± 0.5      | 15          |
| 39             | 60 ± 20              | 46 ± 4         | 60 ± 10        | 68 ± 4          | 62          |
| 42             | 40 ± 10              | 41 ± 4         | 50 ± 10        | 54 ± 2          | 50          |
| 43             | 13 ± 3               | 16 ± 4         | 15 ± 9         | 21 ± 2          | 15          |
| 44             | 13.3 ± 0.8           | 19 ± 6         | 16.5 ± 0.4     | 13.6 ± 0.6      | 14          |
| 46             | 89 ± 3               | 98 ± 2         | 85 ± 2         | 92 ± 22         | 93          |
| 47             | 83.9 ± 0.7           | 98 ± 9         | 82.4 ± 0.2     | 92 ± 5          | 87          |
| 48             | 50 ± 10              | 58 ± 1         | 62.4 ± 0.8     | 60 ± 5          | 49          |
| 49             | 98 ± 2               | 110 ± 10       | 102 ± 2        | 104 ± 5         | 102         |
| 50             | 86 ± 4               | 98 ± 8         | 92 ± 1         | 90 ± 5          | 88          |
| 51             | 87 ± 2               | 99 ± 7         | 92 ± 2         | 96 ± 6          | 87          |
| 52             | 85 ± 2               | 91 ± 4         | 92 ± 2         | 92 ± 5          | 82          |
| 54             | 65 ± 3               | 70.3 ± 0.2     | 70.8 ± 0.9     | 71 ± 3          | 61          |
| 56             | 94.4 ± 0.4           | 101 ± 2        | 98 ± 2         | 100 ± 5         | 91          |
| 57             | 86 ± 3               | 98 ± 8         | 88 ± 1         | 95 ± 5          | 89          |
| 58             | 90 ± 2               | 98 ± 8         | 96 ± 3         | 99 ± 5          | 91          |
| 59             | 92 ± 3               | 102 ± 6        | 97 ± 1         | 98 ± 5          | 92          |
| 60             | 80 ± 10              | 110 ± 10       | 93 ± 1         | 100 ± 5         | 88          |
| 62             | 56 ± 7               | 64 ± 3         | 63.4 ± 0.5     | 61 ± 4          | 55          |
| 63             | 32 ± 6               | 40 ± 2         | 37.3 ± 0.5     | 41 ± 2          | 37          |
| 64             | 62 ± 3               | 69 ± 2         | 70 ± 2         | 76 ± 7          | 55          |

Standard deviation from the mean for three independent measurements is reported for all conditions except for Cl2 dried in the presence of BSA, which was measured once.

**Table S4. Probability that observed protection is random**

|            | CAHS D |    |          | PvLEA4 |    |          | Gelatin |    |          | BSA |    |          |
|------------|--------|----|----------|--------|----|----------|---------|----|----------|-----|----|----------|
|            | +      | -  | <i>p</i> | +      | -  | <i>p</i> | +       | -  | <i>p</i> | +   | -  | <i>p</i> |
| <b>GB1</b> | 48     | 2  | 1.1 E-12 | 47     | 3  | 1.7 E-11 | 41      | 9  | 2.2 E-06 | 27  | 23 | 9.6 E-02 |
| <b>CI2</b> | 25     | 24 | 1.1 E-01 | 20     | 29 | 5.0 E-02 | 30      | 19 | 3.4 E-02 | 16  | 33 | 6.0 E-03 |

Key: +, number of successes ( $\Delta\%$ Protected is positive and not within error of zero)  
 -, number of failures ( $\Delta\%$ Protected within error of zero or negative)  
*p*, probability that observed protection arises from a binomial distribution with 50% chance of protection, i.e. protection (or lack thereof) is random  
 green *p*-values, positive protection is non-random ( $p < .05$ ) → protects  
 red *p*-values, lack of protection is non-random ( $p < .05$ ) → does not protect  
 gray *p*-values, observed protection trend is random ( $p > .05$ ) → not conclusive

## REFERENCES

1. McGinnis, S.; Madden, T. L., Blast: At the Core of a Powerful and Diverse Set of Sequence Analysis Tools. *Nucleic Acids Res.* **2004**, 32 (Web Server issue), W20-W25.
2. Bell, L. N.; Hageman, M. J.; Muraoka, L. M., Thermally Induced Denaturation of Lyophilized Bovine Somatotropin and Lysozyme as Impacted by Moisture and Excipients. *J. Pharm. Sci.* **1995**, 84 (6), 707-712.
3. Tsereteli, G. I.; Belopolskaya, T. B.; Grunina, N. A.; Vaveliuk, O. L., Calorimetric Study of the Glass Transition Process in Humid Proteins and DNA. *J. Therm. Anal. Calorim.* **2000**, 62, 89-99.
4. Warner, L.; Gjersing, E.; Follett, S. E.; Elliott, K. W.; Dzyuba, S. V.; Varga, K., The Effects of High Concentrations of Ionic Liquid on GB1 Protein Structure and Dynamics Probed by High-Resolution Magic-Angle-Spinning NMR Spectroscopy. *Biochem. Biophys. Rep.* **2016**, 8, 75-80.
5. Taylor, J., The Binomial Distribution. In *Introduction to Error Analysis, the Study of Uncertainties in Physical Measurements*, 2 ed.; McGuire, A., Ed. University Science Books: 1997; pp 227-244.
6. Rupley, J. A.; Gratton, E.; Careri, G., Water and Globular Proteins. *Trends Biochem. Sci.* **1983**, 8 (1), 18-22.
